# Supplementary material for: Biological attributes of Hadronotus pubescens (Motschoulsky) (Hymenoptera: Scelionidae) reared on refrigerated eggs of Riptortus pedestris Fabricius (Hemiptera: Alydidae)
Source: Research Square preprint supplement (doi:10.21203/rs.3.rs-6958307/v1), 2025-07-15
Supplement: Supplementary file 1 [file b35ed3473ef55c2f482b0677.xlsx]

## Sheet: Raw data- Eggs survival
	Survival of refrigerated R. pedestris eggs.
	N=50	Duration of refrigeration (days)
	Observed day	0	5	10	15	20	25	30
	1	1	2	9	4	4	3	0
	2	7	4	10	6	2	2	0
	3	3	3	2	2	3	0	0
	4	19	6	4	3	1	0	0
	5	6	12	0	1	0	0	0
	6	11	3	0	0	0	0	0
	7	2	0	0	0	0	0	0
	Sum	49	30	25	16	10	5	0
	Egg hatched %	98	60	50	32	20	10	0
	SE	2.38048	1.4592	1.63091	0.837066	0.611678	0.473804	0
	Survival was quantified by calculating the proportion of hatched eggs to total eggs examined.

## Sheet: Raw data- Behaviours
			Duration (Seconds ± SE) of host acceptance behaviors in different ages of refrigerated R. pedestris eggs
			Druming									Drilling and oviposition									Marking
				Age of host eggs (days)									Age of host eggs (days)									Age of host eggs (days)
			Replication	0	30	45	60	90	120			Replication	0	30	45	60	90	120			Replication	0	30	45	60	90	120
			1	39.2	43.1	50.9	55.6	59.8	68.7			1	416.7	444.2	490.2	550.2	590.1	597.6			1	133.8	177.1	167	157.3	147.6	140.8
			2	35.9	42.6	49.5	55.2	65.7	64.3			2	419.5	440.5	492.3	552.1	593.5	593.5			2	134.9	172.6	163.7	153.9	144.6	144.6
			3	35.2	41.7	45.9	58.6	60.1	60.1			3	417.2	438.2	489.4	560.2	585.7	599.3			3	139.2	169.8	152.4	152.4	152.4	142.9
			4	38.9	44.8	52.1	56.3	57.3	67.9			4	410.3	435.7	495.8	556.4	588.6	598.1			4	143.1	170.8	162.1	152.2	143.1	143.1
			5	41.2	44.7	49.5	53.6	61.7	69.3			5	410.7	432.4	498.6	553.1	596.4	596.4			5	139.6	175.7	165.3	155.4	145.1	145.1
			6	36.1	42.7	55.6	55.8	65.7	66.4			6	413.6	440.4	490.2	550.4	591.4	591.4			6	138.5	167.7	154.1	154.1	154.1	154.1
			7	41.3	40.1	47.6	50.2	58.9	66.5			7	416.8	438.7	491.5	557.9	596.6	596.3			7	134.7	174.5	163.8	153.4	143.6	143.6
			8	37.4	42.6	48.3	54.3	60.2	62.1			8	415.2	448.3	498.6	559.1	597.4	597.1			8	136.8	176.3	169.6	159.8	149.8	139.7
			9	40.8	45.6	55.8	52.6	55.1	66.1			9	414.1	435.9	496.6	551.3	590.6	599.7			9	142.2	176.9	169.8	157.9	147.3	137.3
			10	37.2	43.2	49.2	53.1	57.7	69.9			10	417.3	443.9	501.6	545.3	588.2	598.7			10	140.3	170.7	160.3	150.1	150.1	140.7
			Mean	38.32	43.11	50.44	54.53	60.22	66.13			Mean	415.14	439.82	494.48	553.6	591.85	596.81			Mean	138.31	173.21	162.81	154.65	147.77	143.19
			SE	0.72308	0.509128	1.02677	0.732886	1.08154	1.00089			SE	0.941063	1.49003	1.36201	1.48556	1.26194	0.824277			SE	1.01	1.0574	1.86049	0.936097	1.19108	1.42871

## Sheet: Raw data- Biological parameters
		Effect of refrigerated host eggs on the biological parameters of H. pubescens
		Parasitoid emmerged
		N=100	Age of host eggs (days)
			0		30		45		60		90		120
		Replication	Male	Female	Male	Female	Male	Female	Male	Female	Male	Female	Male	Female
		1	1	7	1	6	2	6	2	5	1	4	2	3
		2	1	5	1	7	1	6	1	5	1	7	1	3
		3	1	8	2	5	2	5	2	4	2	5	1	2
		4	1	6	3	7	1	5	1	6	1	4	2	3
		5	1	8	2	6	1	6	2	4	2	5	1	3
		6	1	8	1	5	1	5	1	5	2	4	2	3
		7	2	6	3	6	2	5	2	3	2	5	1	4
		8	2	6	1	8	1	6	1	5	1	5	2	2
		9	1	8	1	5	1	5	1	5		3
		10	2	8	1	9	1	5	2	4		5
		Sum	13	70	16	64	13	54	15	46	12	47	12	23
		Number of parasitized host eggs/ female
		N=100	Age of host eggs (days)
		Replication	0	30	45	60	90	120
		1	8	7	8	7	5	5
		2	6	8	7	6	7	4
		3	9	7	7	6	6	3
		4	7	10	6	7	6	5
		5	9	8	7	6	6	4
		6	9	6	6	6	6	5
		7	8	9	7	5	7	5
		8	8	9	7	6	5	4
		9	9	6	6	6	5
		10	10	10	6	6	6
		Sum	83	80	67	61	59	35
		Mean	8.3	8	6.7	6.1	5.9	4.375
		SE	0.366667	0.471405	0.213437	0.179505	0.233333	0.263052
		Emergence rate
		N=100	Age of host eggs (days)
		Replication	0	30	45	60	90	120
		1	7	8	6	5	5	3
		2	6	6	7	4	5	4
		3	8	7	5	4	6	3
		4	6	7	6	5	4	3
		5	8	7	5	4	6	4
		6	7	7	6	5	6	4
		7	8	6	7	5	5	5
		8	8	6	6	6	5	4
		9	7	7	6	6	5
		10	7	6	6	6	4
		Sum	72	67	60	50	51	30
		Development time (Female)									Development time (male)
			Age of host eggs (days)									Age of host eggs (days)
		Insect no.	0	30	45	60	90	120			Insect no.	0	30	45	60	90	120
		1	24	26	28	33	37	43			1	25	26	28	33	37	43
		2	25	26	28	33	37	43			2	24	26	27	33	37	43
		3	26	26	28	33	37	44			3	24	26	28	33	37	44
		4	27	26	29	34	37	44			4	25	26	26	33	37	43
		5	25	27	29	34	37	45			5	25	26	28	33	33	43
		6	26	27	30	35	37	44			6	25	26	28	33	37	43
		7	26	26	30	33	37	43			7	25	26	28	34	37	44
		8	27	26	27	33	37	43			8	25	26	28	33	37	43
		9	25	26	27	34	37	44			9	25	26	28	33	37	43
		10	26	26	28	34	37	44			10	25	26	28	33	37	44
		11	28	27	28	34	38	45			11	26	26	28	33	37	43
		12	25	27	29	33	37	45			12	26	26	28	34	37	44
		13	27	27	30	33	37	44			13	26	26	28	33
		14	26	26	28	33	37	44			14		26		33
		15	26	26	28	34	37	45			15		26		33
		16	26	26	28	33	37	45			16		25
		17	25	26	29	33	37	44			Mean	25.0769	25.9375	27.7692	33.1333	36.6667	43.3333
		18	27	26	30	34	37	45			SE	0.177646	0.0625	0.166173	0.0908514	0.333333	0.142134
		19	26	26	28	35	37	44
		20	26	26	28	33	38	43
		21	27	26	29	34	39	43
		22	25	26	29	34	37	43
		23	26	26	30	35	38	43
		24	27	27	28	33	38
		25	28	27	28	33	37
		26	26	26	28	34	37
		27	24	26	29	35	37
		28	26	26	29	34	37
		29	26	26	30	33	38
		30	27	26	28	34	37
		31	25	27	28	35	37
		32	26	26	29	33	37
		33	26	26	29	34	38
		34	26	26	30	34	38
		35	25	26	30	35	37
		36	28	26	28	33	37
		37	27	26	28	34	37
		38	25	26	28	34	37
		39	26	26	29	34	37
		40	27	26	30	34	38
		41	24	26	28	33	38
		42	27	27	29	33	37
		43	26	26	29	34	37
		44	27	26	30	34	37
		45	25	26	30	34	37
		46	26	26	30	33	37
		47	26	26	28		38
		48	27	26	28
		49	26	26	28
		50	26	26	29
		51	26	26	30
		52	26	26	28
		53	26	26	30
		54	27	26	30
		55	25	27
		56	25	26
		57	27	26
		58	26	26
		59	26	26
		60	26	26
		61	28	26
		62	27	26
		63	25	26
		64	26	27
		65	27
		66	26
		67	26
		68	27
		69	28
		70	27
		Mean	26.1286	26.1719	28.7778	33.7174	37.2553	43.913
		SE	0.113154	0.0475318	0.123048	0.101501	0.0711221	0.165301

## Sheet: Biological para (2nd generation
	Effect of second-generation host eggs on the biological parameters of H. pubescens
	Parasitoid emmerged
	N=100	Age of host eggs (days)
		0		30		45		60		90		120
	Replication	Male	Female	Male	Female	Male	Female	Male	Female	Male	Female	Male	Female
	1	2	6	1	7	2	4	1	6	0	6	0	6
	2	1	8	1	7	1	7	1	5	1	8	1	8
	3	1	8	1	9	1	8	1	8	2	7	0	7
	4	1	7	0	5	2	8	1	6	1	6	1	6
	5	1	7	1	9	5	4	1	8	1	7	1	7
	6	2	8	1	6	1	7	1	8	1	6	2	6
	7	1	8	1	8	1	6	2	6		7		7
	8	1	9	1	9	1	7	1	6		6		6
	9	1	9		7	2	6	1	8		8		8
	10	0	8		10	0	9		10		8		8
	Sum	11	78	7	77	16	66	10	71	6	69	5	69
	Number of parasitized host eggs/ female
	N=100	Age of host eggs (days)
	Replication	0	30	45	60	90	120
	1	8	8	6	7	6	6
	2	9	8	8	6	9	9
	3	9	10	9	9	9	7
	4	8	5	10	7	7	7
	5	8	9	9	9	8	8
	6	10	7	8	9	7	8
	7	9	9	7	8	7	7
	8	10	10	8	7	6	6
	9	10	8	8	9	8	8
	10	8	10	9	10	8	8
	Sum	89	84	82	81	75	74
	Mean	8.9	8.4	8.2	8.1	7.5	7.4
	SE	0.276887	0.498888	0.359011	0.406885	0.341565	0.305505
	Emergence rate
	N=100	Age of host eggs (days)
	Replication	0	30	45	60	90	120
	1	8	8	6	7	6	6
	2	9	8	8	6	9	7
	3	9	9	9	9	7	7
	4	8	5	10	7	7	7
	5	8	9	9	9	8	8
	6	10	7	8	8	7	8
	7	9	9	7	8	7	7
	8	10	7	8	7	6	6
	9	8	8	7	9	8	7
	10	8	10	7	7	8	8
	Sum	87	80	79	77	73	71
	Development time (Female)									Development time (male)
		Age of host eggs (days)									Age of host eggs (days)
	Insect no.	0	30	45	60	90	120			Insect no.	0	30	45	60	90	120
	1	15	14	15	15	15	15			1	15	15	15	15	15	15
	2	15	14	15	15	15	15			2	15	14	15	15	15	15
	3	15	14	15	15	15	15			3	15	14	15	15	14	16
	4	15	14	15	15	15	15			4	15	15	15	15	16	17
	5	15	14	15	15	15	15			5	15	15	15	15	17	16
	6	15	14	15	15	15	15			6	14	14	15	15	17
	7	15	14	15	15	15	15			7	14	15	14	15
	8	16	14	15	15	16	16			8	14		16	15
	9	15	14	15	15	15	15			9	13		16	16
	10	15	14	15	15	15	15			10	13		15	15
	11	15	14	15	15	15	15			11	14		15
	12	15	15	15	15	15	15			12			14
	13	15	15	15	15	15	15			13			15
	14	15	14	15	15	15	15			14			15
	15	16	14	15	15	16	16			15			15
	16	16	14	15	15	16	16			16			15
	17	15	14	15	15	15	15			Mean	14.2727	14.5714	15	15.1	15.6667	15.8
	18	15	14	15	15	15	15			SE	0.237062	0.202031	0.129099	0.1	0.494413	0.374166
	19	15	15	15	15	15	15
	20	15	15	15	15	15	15
	21	15	15	15	15	15	15
	22	15	14	15	15	15	15
	23	16	14	15	15	16	16
	24	15	14	15	15	16	16
	25	15	14	15	15	15	15
	26	15	14	16	15	15	15
	27	15	15	16	15	15	15
	28	14	14	16	15	16	16
	29	14	14	16	15	16	16
	30	14	14	16	15	16	16
	31	14	14	16	15	16	16
	32	14	14	16	15	16	16
	33	14	14	16	15	16	16
	34	14	14	16	15	16	16
	35	14	15	16	15	16	16
	36	14	14	16	15	16	16
	37	14	14	18	15	16	16
	38	14	14	19	15	16	16
	39	15	14	15	15	16	16
	40	15	14	15	15	16	16
	41	15	15	15	15	16	16
	42	15	15	15	15	16	16
	43	16	15	15	15	16	16
	44	15	14	17	16	16	16
	45	15	15	15	16	16	16
	46	15	15	15	16	16	16
	47	15	15	15	16	16	16
	48	15	15	15	16	16	16
	49	15	15	15	16	16	16
	50	15	16	15	16	16	16
	51	16	16	15	16	16	16
	52	15	16	15	16	16	16
	53	15	16	15	16	16	16
	54	15	15	15	16	16	16
	55	15	15	15	16	16	16
	56	15	15	15	16	16	16
	57	15	15	15	16	16	16
	58	15	16	15	16	16	16
	59	14	16	15	16	16	17
	60	14	16	16	16	16	17
	61	14	16	16	16	16	17
	62	14	16	15	16	16	16
	63	14	16	15	16	16	16
	64	14	16	14	16	16	16
	65	14	15	14	16	16	16
	66	14	15	14	16	16	16
	67	14	15		16	16	16
	68	14	15		15	15	17
	69	14	15		15	16	17
	70	14	15		15	16
	71	14	15		15	14
	72	15	16
	73	14	15
	74	14	15
	75	15	14
	76	15	14
	77	15	14
	78	15
	Mean	14.7436	14.6753	15.2879	15.338	15.6479	15.7536
	SE	0.0668891	0.0835834	0.0959923	0.0565389	0.0605095	0.0697267

## Sheet: Raw data-Longivity
		Longevity of H. pubescens (male & female) emerged from refrigerated egg of R. pedestris.															Longevity of second-generation of H. pubescens (male & female) emerged from refrigerated egg of R. pedestris.
		Longivity of H. pubescens (days)															Longivity of Second generation of H. pubescens (days)
			Duration of refrigeration (days)															Duration of refrigeration (days)
			0		30		45		60		90		120					0		30		45		60		90		120
		Insect no.	Male	Female	Male	Female	Male	Female	Male	Female	Male	Female	Male	Female			Insect no.	Male	Female	Male	Female	Male	Female	Male	Female	Male	Female	Male	Female
		1	20	24	20	20	19	19	20	20	16	17	14	14			1	24	27	26	27	15	16	15	15	16	19	16	18
		2	22	23	22	23	19	19	20	20	17	17	14	15			2	27	28	26	27	15	17	15	15	15	19	11	18
		3	21	23	21	23	18	19	20	21	16	18	14	15			3	25	29	26	27	24	22	15	15	14	19	15	18
		4	21	23	21	23	18	20	20	21	16	16	14	15			4	25	30	24	27	22	22	15	15	15	19	17	19
		5	20	23	20	23	19	20	20	21	16	17	15	16			5	26	31	24	27	22	23	18	19	16	20	16	20
		6	20	24	20	24	19	20	19	22	16	17	14	14			6	26	32	24	27	23	26	16	22	16	20		20
		7	20	22	20	22	19	21	19	20	17	16	15	15			7	27	25	24	27	21	26	15	23		21		21
		8	21	22	22	22	18	19	19	20	17	17	14	23			8	25	26		27	21	27	15	28		22		22
		9	23	22	23	22	18	20	19	21	17	16	14	15			9	25	26		28	21	24	16	33		17		22
		10	22	23	22	23	19	20	20	21	16	17	15	14			10	26	28		28	21	24	15	19		17		22
		11	22	24	21	24	18	20	20	21	17	18	14	15			11	26	29		28	21	24		19		17		22
		12	22	24	21	24	19	20	20	20	16	17	14	15			12		31		28	21	25		19		17		22
		13	22	24	22	24	18	20	20	20		18		16			13		31		28	21	25		20		22		22
		14		22	22	22		19	20	21		18		16			14		25		28	22	26		20		22		22
		15		23	21	23		19	20	21		17		16			15		25		27	19	27		20		22		22
		16		23	21	23		19		19		17		15			16		26		27	20	28		23		22		22
		17		24		24		19		19		18		15			17		26		27		24		15		22		22
		18		24		24		20		20		17		14			18		27		27		25		15		22		22
		19		21		21		19		20		17		15			19		27		27		25		15		22		22
		20		21		21		19		19		17		16			20		27		27		25		19		22		22
		21		21		21		20		20		18		16			21		28		27		25		19		22		22
		22		21		21		20		20		17		16			22		26		26		25		19		22		22
		23		21		21		20		21		17		16			23		26		26		26		20		22		22
		24		22		22		18		20		18					24		27		26		27		20		22		22
		25		22		22		18		20		16					25		27		26		24		26		22		22
		26		22		22		19		20		16					26		27		26		24		19		22		22
		27		23		23		19		21		17					27		28		26		25		19		22		23
		28		23		23		20		18		17					28		29		26		25		22		22		23
		29		23		23		20		20		18					29		30		27		26		25		22		23
		30		24		24		18		20		18					30		28		27		30		26		22		23
		31		24		24		18		21		17					31		29		27		30		18		22		23
		32		22		22		19		20		17					32		29		27		23		18		22		23
		33		23		23		19		20		16					33		30		27		24		22		22		23
		34		24		24		20		21		16					34		25		25		24		22		19		23
		35		24		24		20		21		16					35		25		25		24		22		19		23
		36		25		25		18		20		17					36		26		26		25		22		19		23
		37		21		21		19		20		17					37		27		26		25		22		19		23
		38		21		21		20		21		17					38		27		22		26		22		19		23
		39		22		22		20		21		17					39		28		26		21		23		19		23
		40		22		22		20		21		18					40		29		26		22		19		19		18
		41		23		23		19		20		18					41		25		27		25		19		19		18
		42		23		23		19		20		18					42		25		27		26		19		19		18
		43		22		22		19		21		18					43		25		27		29		20		22		22
		44		22		22		20		21		18					44		26		27		29		24		18		18
		45		22		22		20		21		18					45		26		27		29		26		20		20
		46		23		23		20		20		17					46		27		27		29		18		20		20
		47		23		23		19				18					47		26		27		23		18		22		22
		48		23		23		20									48		27		27		23		20		22		22
		49		23		23		20									49		28		27		23		22		23		23
		50		24		24		20									50		29		27		24		24		18		18
		51		21		21		21									51		29		27		23		26		18		18
		52		21		21		20									52		30		27		21		27		20		20
		53		22		22		21									53		32		27		22		32		20		20
		54		23		23		20									54		24		27		26		14		20		20
		55		23		23											55		24		27		21		14		23		23
		56		21		21											56		26		26		21		19		23		19
		57		22		22											57		26		27		22		19		23		20
		58		22		22											58		28		27		22		21		23		20
		59		22		22											59		28		27		21		21		20		20
		60		22		23											60		24		27		23		24		20		20
		61		22		23											61		24		26		23		25		20		20
		62		22		23											62		24		27		23		32		23		23
		63		23		24											63		26		27		25		30		23		23
		64		23		24											64		29		27		20		20		23		17
		65		23													65		25		27		20		20		23		19
		66		23													66		26		27		20		20		23		19
		67		23													67		26		27				20		23		19
		68		23													68		26		27				22		23		19
		69		23													69		28		27				21		23		0
		70		23													70		28		27				21
		Mean	21.2308	22.6286	21.1875	22.6094	18.5385	19.5185	19.7333	20.3478	16.4167	17.1702	14.25	15.5217			71		26		28				20
		SE	0.280883	0.117199	0.227646	0.134771	0.14391	0.101494	0.118187	0.108647	0.148647	0.102328	0.130558	0.371247			72		26		26
																	73		27		26
																	74		27		27
																	75		26		27
																	76		27		27
																	77		29		26
																	78		29
																	Mean	25.6364	27.2	24.8571	26.7714	20.5625	24.1667	15.5	21.0141	15.3333	20.8551	15	20.7101
																	SE	0.278722	0.218262	0.404061	0.0940763	0.61216	0.340426	0.307318	0.488703	0.333333	0.220705	1.04881	0.374542
